# Supplementary material for: The who and how of attentional bias in cannabis users: associations with use severity, craving and interference control
Source: PubMed Central journal article supplement — Addiction. 2022 Oct 17;118(2):307–16. doi: 10.1111/add.16059 (PMC10091751; doi:10.1111/add.16059), 2022-10-17
Supplement: ADD-118-307-s001.pdf [file ADD-118-307-s001.pdf]

# Supplementary Materials

## The who and how of attentional bias in cannabis users: associations with use severity, craving, and interference control

Emese Kroon<sup>1,2</sup>, Lauren Kuhns<sup>1,2</sup>, Annette Dunkerbeck<sup>3</sup> & Janna Cousijn<sup>1,2,4</sup>

<sup>1</sup>Neuroscience of Addiction (NofA) Lab, Department of Psychology, University of Amsterdam, The Netherlands

<sup>2</sup>ADAPT-laboratory, Department of Psychology, University of Amsterdam, the Netherlands

<sup>3</sup>Dimence, SCOS, Deventer

<sup>4</sup>Department of Psychology, Education & Child Studies, Erasmus University Rotterdam, The Netherlands

**Correspondence:** Emese Kroon, [e.kroon@uva.nl](mailto:e.kroon@uva.nl), P.O. box 15916, 1001 NK Amsterdam, The Netherlands

**Declarations of interest:** none

**Funding:** This research was supported by grant 1R01 DA042490-01A1 awarded to Janna Cousijn from the National Institute on Drug Abuse/National Institute of Health.

**Author contributions:** All authors reviewed and approved the final version. *Conceptualization:* EK, LK & JC; *Methodology:* EK, LK & JC; *Investigation:* EK, LK, AD & JC; *Formal Analysis:* EK & LK; *Data curation:* EK & LK; *Writing – Original draft:* EK; *Writing – Review & Editing:* LK, AD & JC; *Visualization:* EK; *Supervision:* JC; *Funding Acquisition:* JC.

**Data Accessibility:** The data, code and materials of this study are available from the corresponding author upon reasonable request.

**Preregistration:** The analysis plans were preregistered ([https://aspredicted.org/7JT\\_TN7](https://aspredicted.org/7JT_TN7))

**Study 1 (N = 106)**

This study included individuals that used cannabis on a near-daily basis but were not in treatment for CUD (Regular users) and a matched control group that used little or no cannabis and had not used recently (Never-sporadic and Occasional users) and was conducted over multiple years between 2019 and 2021. Craving was assessed using a visual analogue scale (VAS) at the start and the end of the session. Total session length was approximately 4 hours, including MRI procedures. Stroop data collected in this study was not published before due to recent completion of the study.

**Study 2 (N = 68)**

This study included individuals that used cannabis multiple times a week but were not in treatment for CUD (Regular users) and a matched control group that used little or no cannabis and had not used recently (Never-sporadic and Occasional users). Craving was assessed using the Marijuana Craving Questionnaire (MCQ; Heishman et al., 2001) at the start and the end of the session. Total session length was approximately 3 hours, including MRI procedures. Stroop data collected in this study was not published before due to the small sample size of the individual dataset.

**Study 3 (N = 58, N = 55 included)**

This study included individuals that used cannabis multiple times a week but were not in treatment for CUD (Regular users) and a matched control group that used little or no cannabis and had not used recently (Never-sporadic and Occasional users). Craving was assessed using the MCQ at the start and the end of the session. Total session length was approximately 3 hours, including MRI procedures. Stroop data collected in this study was published before (Cousijn, Watson, et al., 2013).

**Study 4 (N = 40)**

This study included individuals in treatment for CUD (CUD users). Craving was assessed using a VAS at the start and the end of the session. Total session length was approximately 45 minutes. Stroop data collected in this study was published before (van Kampen et al., 2020).

**Study 5 (N = 57)**

This study included individuals in treatment for CUD (CUD users) and was conducted over multiple years between 2012 and 2014. Craving was assessed using a VAS at the start and the end of the session. Total session length was less than 1 hour and took place in the addiction care facility. Stroop data collected in this study was published before (Cousijn et al., 2015).

**Study 6 (N = 90, N = 86 included)**

This study included individuals that used cannabis multiple times a week (some exceptions included, see Table S1) but were not in treatment for CUD (Regular users). Session induced craving was assessed using the MCQ at the start and the end of the session. Total session length was approximately 30 minutes and conducted within a Dutch cannabis dispensary. Stroop data collected in this study was published before (Cousijn, Snoek, et al., 2013).

**Study 7 (N = 93, N = 90 included)**

This study included individuals that used cannabis multiple times a week but were not in treatment for CUD (Regular users). Craving was assessed using the MCQ at the start and the end of the session. Total session length was approximately 45 minutes. Stroop data collected in this study was published before (Cousijn & van Duijvenvoorde, 2018).

**Study 8 (N = 48)**

This study included individuals that used cannabis multiple times a week but were not in treatment for CUD (Regular users) and a matched control group that used little to no cannabis (Never-sporadic users). Craving was assessed using a VAS at the start and the end of the session. Total session length was approximately 2 hours. Stroop data collected in this study was not published before due to the small sample size of the individual dataset. No AUDIT scores were recorded in this study.

**Figure S1. Overview of included studies**

### **Deviations from the pre-registration**

All deviations from the pre-registration are referred to as exploratory analysis in the manuscript. Details on the deviations are provided below.

#### *Additional Variables*

In addition to the pre-registered session induced craving variable (the change between start of session and end of session craving), we have added a measure of average session craving (the average of start of session and end of session craving). While the session induced craving measure reflects the craving that builds over the time of the test session, potentially affected by drug cue exposure during the session, this increase or decrease does not reflect the absolute level of craving one experiences. Hence, we included a measure that better reflects the extent to which one craves cannabis at the moment of testing.

#### *Additional Analyses*

All correlational, simple regression, moderation, mediation, and moderated mediation models that included session induced craving (as pre-registered) were re-ran using average session craving instead.

#### *Multiple comparison corrections*

Unlike pre-registered, Bonferroni corrections for multiple comparison corrections were applied to the correlation and simple regression analyses. For these analyses, uncorrected and corrected p-values are provided in the manuscript.

### **Figure S2. Overview of deviations from the pre-registration**

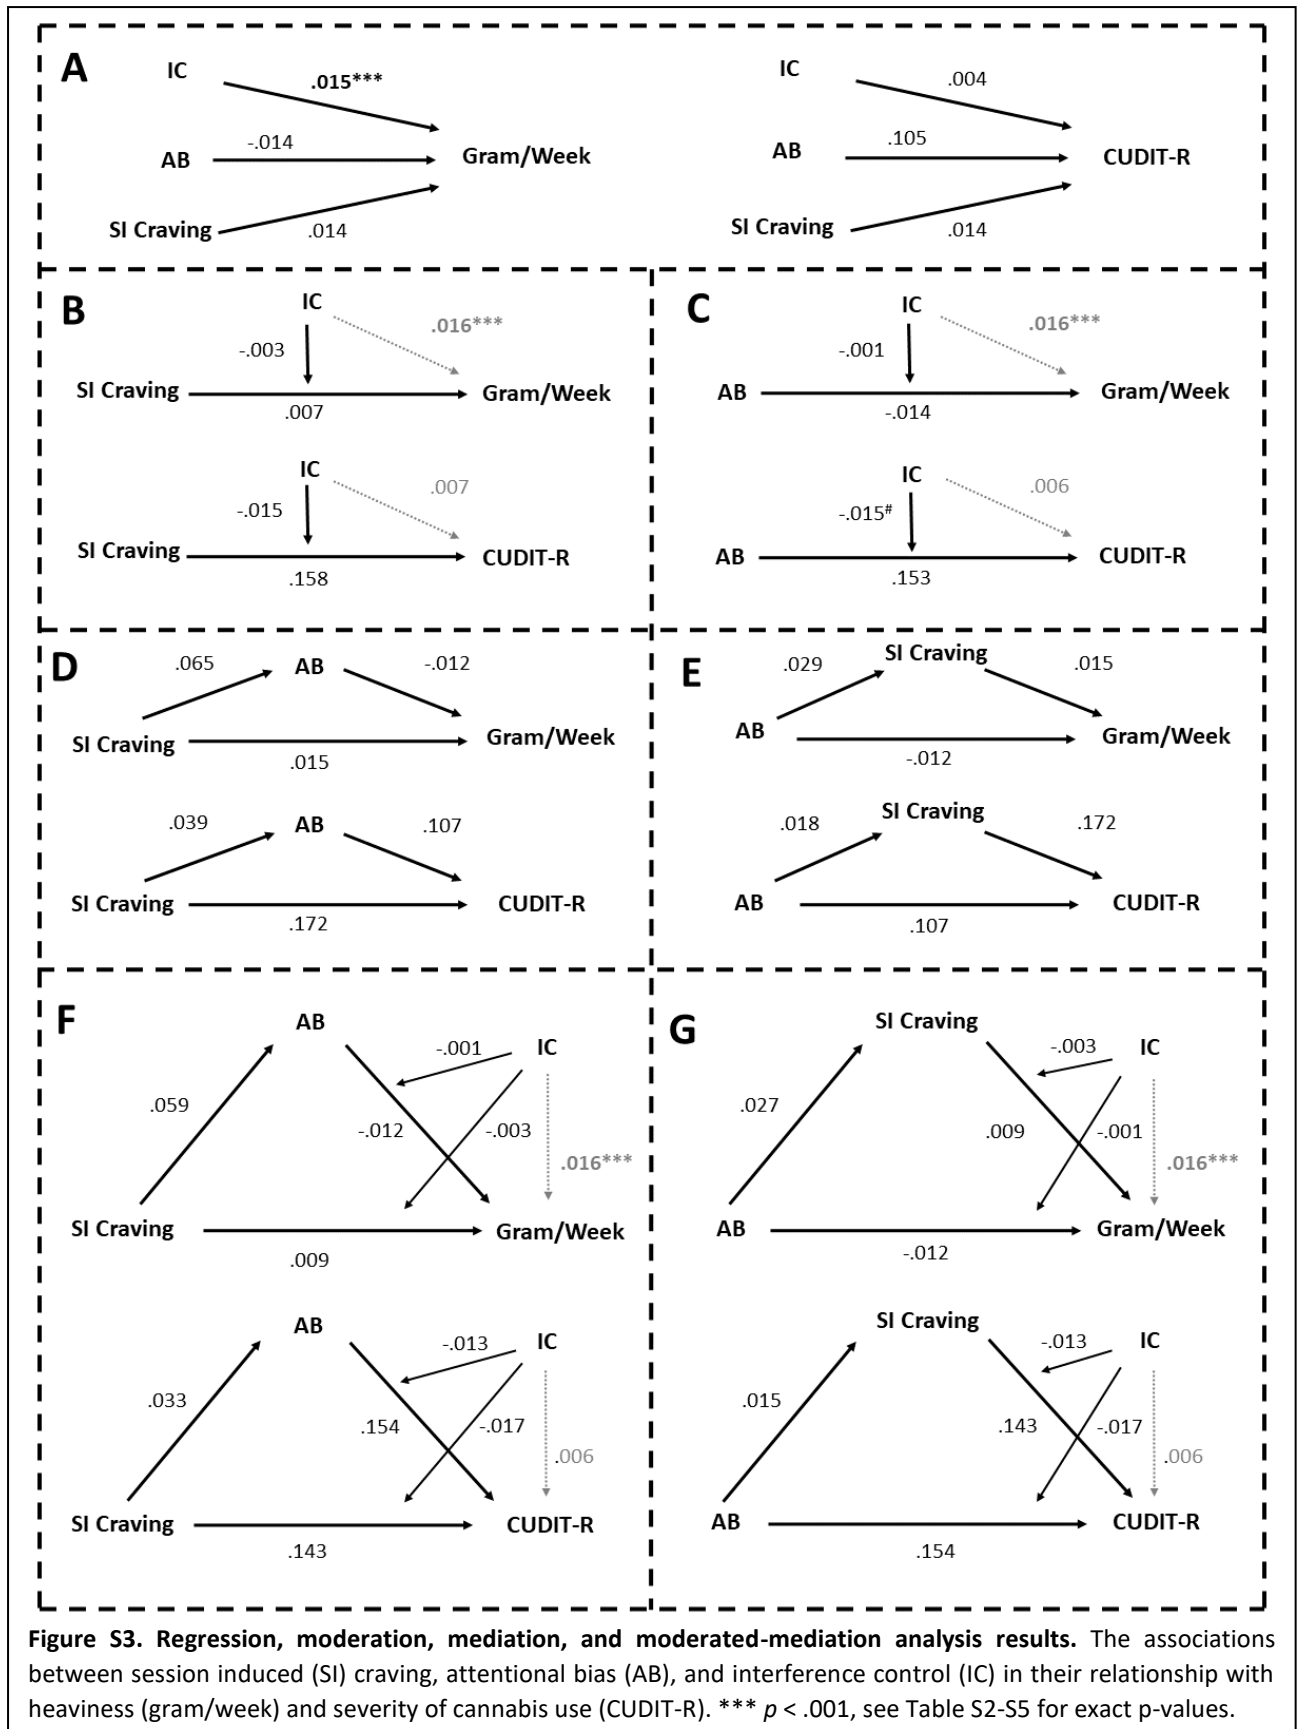

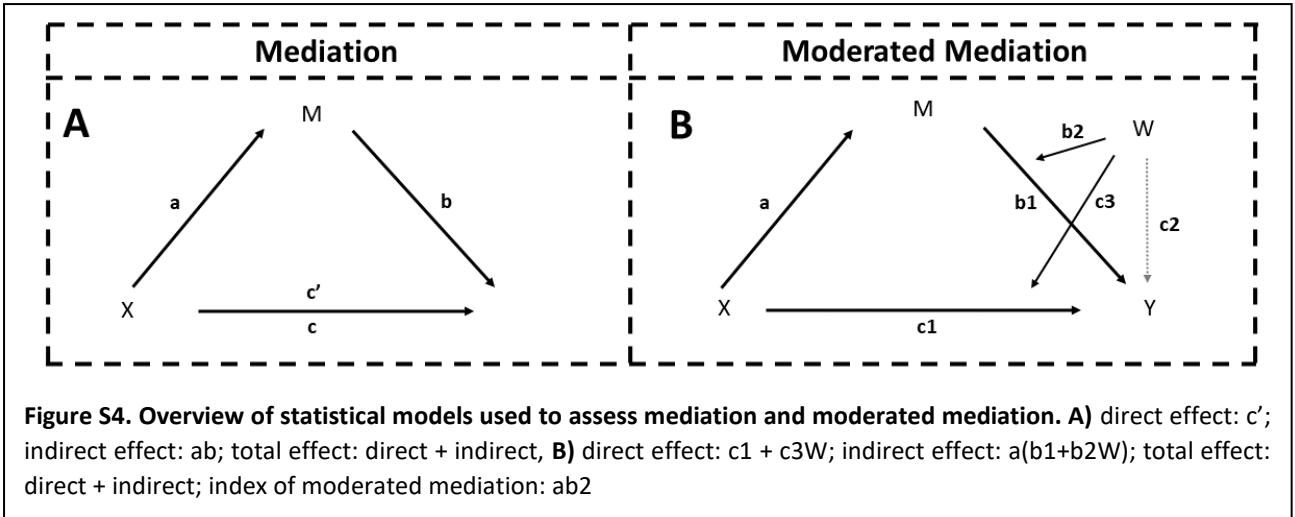

## Attentional Bias in Cannabis Users

| <b>Table S1. Overview of participants per included study</b>                                                                             |                |            |            |         |     |           |
|------------------------------------------------------------------------------------------------------------------------------------------|----------------|------------|------------|---------|-----|-----------|
|                                                                                                                                          | Never-Sporadic | Occasional | In between | Regular | CUD | Total     |
| Study 1                                                                                                                                  | 22             | 21         | x          | 63      | X   | 106       |
| Study 2                                                                                                                                  | 28             | 5          | x          | 35      | X   | 68        |
| Study 3                                                                                                                                  | 24             | 7          | 3          | 24      | X   | 55 (58)   |
| Study 4                                                                                                                                  | x              | x          | x          | x       | 40  | 40        |
| Study 5                                                                                                                                  | x              | x          | x          | x       | 57  | 57        |
| Study 6                                                                                                                                  | x              | 2          | 4          | 84      | X   | 86 (90)   |
| Study 7                                                                                                                                  | x              | x          | 1          | 92      | X   | 92 (93)   |
| Study 8                                                                                                                                  | 23             | x          | x          | 25      | X   | 48        |
| Total                                                                                                                                    | 97             | 35         | 8          | 323     | 97  | 552 (560) |
| Note: all excluded participants and totals including those participants presented in grey, all included participants presented in black. |                |            |            |         |     |           |

## Attentional Bias in Cannabis Users

| <b>Table S2. Correlation table displaying within person (N = 40) correlation of different standardized measures of craving and their association with included measures of cannabis use</b> |                          |                          |                          |                           |                          |           |
|---------------------------------------------------------------------------------------------------------------------------------------------------------------------------------------------|--------------------------|--------------------------|--------------------------|---------------------------|--------------------------|-----------|
|                                                                                                                                                                                             | MCQ craving average      | MCQ craving change       | VAS craving average      | VAS craving change        | CUDIT-R                  | Gram/Week |
| MCQ craving average                                                                                                                                                                         | -                        | -                        | -                        | -                         | -                        | -         |
| MCQ craving change                                                                                                                                                                          | $r = .436$<br>$p = .005$ | -                        | -                        | -                         | -                        | -         |
| VAS craving average                                                                                                                                                                         | $r = .806$<br>$p < .001$ | $r = .452$<br>$p = .003$ | -                        | -                         | -                        | -         |
| VAS craving change                                                                                                                                                                          | $r = .149$<br>$p = .358$ | $r = .500$<br>$p = .001$ | $r = .257$<br>$p = .109$ | -                         | -                        | -         |
| CUDIT-R                                                                                                                                                                                     | $r = .364$<br>$p = .021$ | $r = .131$<br>$p = .422$ | $r = .293$<br>$p = .067$ | $r = .122$<br>$p = .452$  | -                        | -         |
| Gram/Week                                                                                                                                                                                   | $r = .455$<br>$p = .003$ | $r = .184$<br>$p = .255$ | $r = .540$<br>$p < .001$ | $r = -.119$<br>$p = .463$ | $r = .420$<br>$p = .007$ | -         |

Note: CUDIT-R; cannabis use disorder identification tests – revised; MCQ: marijuana craving questionnaire, VAS: visual analogue scale

Attentional Bias in Cannabis Users

| Table S3. Simple regression results |          |               |              |          |          |                         |                                                                             |
|-------------------------------------|----------|---------------|--------------|----------|----------|-------------------------|-----------------------------------------------------------------------------|
| Model                               | Results  |               |              |          |          |                         |                                                                             |
| <b>CUDIT-R</b>                      | <b>B</b> | <b>SE (B)</b> | <b>95%CI</b> | <b>t</b> | <b>p</b> | <b>p<sub>bonf</sub></b> | <b>F-test</b>                                                               |
| Intercept                           | -.057    | .346          | -.737 - .624 | .164     | .870     | 1.0                     | F(1,338) = 1.301, R <sup>2</sup> < .001, p = .255, p <sub>bonf</sub> = .765 |
| SI Craving                          | .171     | .150          | -.124 - .467 | 1.141    | .255     | .765                    |                                                                             |
| <b>CUDIT-R</b>                      | <b>B</b> | <b>SE (B)</b> | <b>95%CI</b> | <b>t</b> | <b>p</b> | <b>p<sub>bonf</sub></b> | <b>F-test</b>                                                               |
| Intercept                           | -.013    | .341          | -.684 - .659 | .037     | .970     | 1.0                     | F(1,350) = .023, R <sup>2</sup> = -.003, p = .881, p <sub>bonf</sub> = 1.0  |
| Interference control                | .004     | .027          | -.050 - .058 | .150     | .881     | 1.0                     |                                                                             |
| <b>CUDIT-R</b>                      | <b>B</b> | <b>SE (B)</b> | <b>95%CI</b> | <b>t</b> | <b>p</b> | <b>p<sub>bonf</sub></b> | <b>F-test</b>                                                               |
| Intercept                           | .015     | .341          | -.656 -0.685 | .043     | .966     | 1.0                     | F(1,352) = 1.082, R <sup>2</sup> < .001, p = .299, p <sub>bonf</sub> = .897 |
| Attentional bias                    | .104     | .101          | -.093 - .303 | 1.04     | .299     | .897                    |                                                                             |
| <b>Grams per week</b>               | <b>B</b> | <b>SE (B)</b> | <b>95%CI</b> | <b>t</b> | <b>p</b> | <b>p<sub>bonf</sub></b> | <b>F-test</b>                                                               |
| Intercept                           | .994     | .052          | .891 - 1.096 | 19.064   | <.001    | <.001                   | F(1,330) = .383, R <sup>2</sup> = -.002, p = .536, p <sub>bonf</sub> = 1.0  |
| SI Craving                          | .014     | .023          | .031 - .060  | .619     | .536     | 1.0                     |                                                                             |
| <b>Grams per week</b>               | <b>B</b> | <b>SE (B)</b> | <b>95%CI</b> | <b>t</b> | <b>p</b> | <b>p<sub>bonf</sub></b> | <b>F-test</b>                                                               |
| Intercept                           | 1.004    | .050          | .905 - 1.103 | 20.025   | <.001    | <.001                   | F(1,343) = 14.23, R <sup>2</sup> = .037, p < .001, p <sub>bonf</sub> < .001 |
| Interference control                | .015     | .004          | .007 - .023  | 3.772    | <.001    | <.001                   |                                                                             |
| <b>Grams per week</b>               | <b>B</b> | <b>SE (B)</b> | <b>95%CI</b> | <b>t</b> | <b>p</b> | <b>p<sub>bonf</sub></b> | <b>F-test</b>                                                               |
| Intercept                           | .999     | .051          | .899 - 1.098 | 19.710   | <.001    | <.001                   | F(1,347) = .807, R <sup>2</sup> < .001, p = .370, p <sub>bonf</sub> = 1.0   |
| Attentional bias                    | -.014    | .015          | -.043 - .016 | -8.99    | .370     | 1.0                     |                                                                             |

Note: CUDIT-R: cannabis use disorder identification test; p<sub>bonf</sub> : Bonferroni corrected p-values; SI craving: session induced craving; SE: standard error; R<sup>2</sup>: adjusted R-squared



Attentional Bias in Cannabis Users

| <b>Table S4. Moderation results</b>     |                |               |              |          |          |                         |
|-----------------------------------------|----------------|---------------|--------------|----------|----------|-------------------------|
| <b>Model</b>                            | <b>Results</b> |               |              |          |          |                         |
| <b>CUDIT-R</b>                          | <b>B</b>       | <b>SE (B)</b> | <b>95%CI</b> | <b>z</b> | <b>p</b> | <b>p<sub>bonf</sub></b> |
| Intercept                               | -.055          | .347          | -.735 - .625 | .158     | .874     | 1.0                     |
| SI Craving                              | .158           | .151          | -.138 - .455 | 1.046    | .295     | .591                    |
| Interference control                    | .007           | .028          | -.048 - .061 | .241     | .810     | 1.0                     |
| SI Craving * Interference control       | -.015          | .013          | -.041 - .011 | 1.137    | .255     | .511                    |
| <b>CUDIT-R</b>                          | <b>B</b>       | <b>SE (B)</b> | <b>95%CI</b> | <b>z</b> | <b>p</b> | <b>p<sub>bonf</sub></b> |
| Intercept                               | .040           | .341          | -.629 - .709 | .117     | .907     | 1.0                     |
| Attentional bias                        | .153           | .104          | .000 - .023  | 1.470    | .141     | .282                    |
| Interference control                    | .006           | .027          | -.103 - .143 | .211     | .833     | 1.0                     |
| Attentional bias * Interference control | -.015          | .008          | -.018 - .001 | 1.964    | .050     | .099                    |
| <b>Grams per week</b>                   | <b>B</b>       | <b>SE (B)</b> | <b>95%CI</b> | <b>z</b> | <b>p</b> | <b>p<sub>bonf</sub></b> |
| Intercept                               | .999           | .051          | .899 - 1.100 | 19.470   | <.001    | <.001                   |
| SI Craving                              | .007           | .024          | -.018 - .130 | .296     | .767     | 1.0                     |
| Interference control                    | .016           | .004          | .294 - .803  | 3.826    | <.001    | <.001                   |
| SI Craving * Interference control       | -.003          | .002          | -.129 - .025 | 1.240    | .215     | .430                    |
| <b>Grams per week</b>                   | <b>B</b>       | <b>SE (B)</b> | <b>95%CI</b> | <b>z</b> | <b>P</b> | <b>p<sub>bonf</sub></b> |
| Intercept                               | 1.005          | .050          | .907 - 1.104 | 20.084   | <.001    | <.001                   |
| Attentional bias                        | -.014          | .015          | -.044 - .016 | .904     | .366     | .732                    |
| Interference control                    | .016           | .004          | .008 - .024  | 3.936    | <.001    | <.001                   |
| Attentional bias * Interference control | -.001          | .001          | -.003 - .001 | .810     | .418     | .836                    |

*Note: CUDIT-R: cannabis use disorder identification test; p<sub>bonf</sub>: Bonferroni corrected p-values; SI craving: session induced craving; SE: standard error; Maximum likelihood estimation used in all models.*

Attentional Bias in Cannabis Users

| <b>Table S5. Mediation results</b> |                |               |              |          |          |                         |
|------------------------------------|----------------|---------------|--------------|----------|----------|-------------------------|
| <b>Model</b>                       | <b>Results</b> |               |              |          |          |                         |
| <b>CUDIT-R</b>                     | <b>B</b>       | <b>SE (B)</b> | <b>95%CI</b> | <b>z</b> | <b>p</b> | <b>p<sub>bonf</sub></b> |
| CUDIT-R ~ SI Craving (c)           | .172           | .153          | -.127 - .471 | 1.128    | .259     | .519                    |
| Attentional Bias ~ SI Craving (a)  | .039           | .081          | -.120 - .199 | .483     | .629     | 1.0                     |
| CUDIT-R ~ Attentional Bias (b)     | .107           | .102          | -.093 - .307 | 1.047    | .295     | .591                    |
| Indirect (ab)                      | .004           | .010          | -.015 - .023 | .438     | .661     | 1.0                     |
| Direct (c')                        | .172           | .153          | -.127 - .471 | 1.128    | .259     | .519                    |
| Total (ab + c')                    | .176           | .153          | -.123 - .476 | 1.154    | .248     | .497                    |
| <b>CUDIT-R</b>                     | <b>B</b>       | <b>SE (B)</b> | <b>95%CI</b> | <b>z</b> | <b>p</b> | <b>p<sub>bonf</sub></b> |
| CUDIT-R ~ Attentional bias (c)     | .107           | .102          | -.002 - .006 | 1.047    | .295     | .591                    |
| SI Craving ~ Attentional bias (a)  | .018           | .036          | -.028 - .042 | .483     | .629     | 1.0                     |
| CUDIT-R ~ SI Craving (b)           | .172           | .153          | -.005 - .020 | 1.128    | .259     | .519                    |
| Indirect (ab)                      | .003           | .007          | .000 - .000  | .444     | .657     | 1.0                     |
| Direct (c')                        | .107           | .102          | -.002 - .006 | 1.047    | .295     | .591                    |
| Total (ab + c')                    | .110           | .102          | -.002 - .006 | 1.075    | .283     | .565                    |
| <b>Grams per week</b>              | <b>B</b>       | <b>SE (B)</b> | <b>95%CI</b> | <b>z</b> | <b>p</b> | <b>p<sub>bonf</sub></b> |
| Grams/Week ~ SI Craving (c)        | .015           | .023          | -.030 - .061 | .656     | .512     | 1.0                     |
| Attentional Bias ~ SI Craving (a)  | .065           | .083          | -.096 - .227 | .793     | .428     | .856                    |
| Grams/Week ~ Attentional Bias (b)  | -.012          | .015          | -.043 - .018 | .806     | .420     | .841                    |
| Indirect (ab)                      | -.001          | .001          | -.004 - .002 | .565     | .572     | 1.0                     |
| Direct (c')                        | .015           | .023          | -.030 - .061 | .656     | .512     | 1.0                     |
| Total (ab + c')                    | .014           | .023          | -.032 - .060 | .621     | .535     | 1.0                     |
| <b>Grams per week</b>              | <b>B</b>       | <b>SE (B)</b> | <b>95%CI</b> | <b>z</b> | <b>p</b> | <b>p<sub>bonf</sub></b> |
| Grams/Week ~ Attentional bias (c)  | -.012          | .015          | -.043 - .018 | .806     | .420     | .841                    |
| SI Craving ~ Attentional bias (a)  | .029           | .036          | -.043 - .100 | .793     | .428     | .856                    |
| Grams/Week ~ SI Craving (b)        | .015           | .023          | -.030 - .061 | .656     | .512     | 1.0                     |
| Indirect (ab)                      | .000           | .001          | -.001 - .002 | .505     | .613     | 1.0                     |
| Direct (c')                        | -.012          | .015          | -.043 - .018 | .806     | .420     | .840                    |
| Total (ab + c')                    | -.012          | .015          | -.042 - .018 | .778     | .437     | .874                    |

*Note: CUDIT-R: cannabis use disorder identification test; p<sub>bonf</sub> : Bonferroni corrected p-values; SI craving: session induced craving; SE: standard error; Maximum likelihood estimation used in all models.*

Attentional Bias in Cannabis Users

| <b>Table S6. Moderated-Mediation results</b>             |                |               |              |          |                 |                         |
|----------------------------------------------------------|----------------|---------------|--------------|----------|-----------------|-------------------------|
| <b>Model</b>                                             | <b>Results</b> |               |              |          |                 |                         |
| <b>CUDIT-R</b>                                           | <b>B</b>       | <b>SE (B)</b> | <b>95%CI</b> | <b>z</b> | <b>p</b>        | <b>p<sub>bonf</sub></b> |
| CUDIT-R ~ SI Craving (c1)                                | .143           | .158          | -.167 - .452 | .904     | .366            | .732                    |
| Attentional Bias ~ SI Craving (a)                        | .033           | .081          | -.126 - .192 | .407     | .684            | 1.0                     |
| CUDIT-R ~ Attentional bias (b1)                          | .154           | .103          | -.048 - .355 | 1.496    | .135            | .269                    |
| CUDIT-R ~ Interference control (c2)                      | .006           | .028          | -.049 - .061 | .219     | .826            | 1.0                     |
| CUDIT-R ~ Attentional bias * Interference control (b2)   | -.013          | .008          | -.029 - .002 | 1.732    | .083            | .167                    |
| CUDIT-R ~ SI Craving * Interference control (c3)         | -.017          | .015          | -.047 - .013 | 1.111    | .267            | .533                    |
| Indirect (a(b + b2W))                                    | .005           | .013          | -.021 - .031 | .393     | .694            | 1.0                     |
| Direct (c1+c3W)                                          | .146           | .158          | -.163 - .455 | .924     | .356            | .711                    |
| Total (direct+indirect)                                  | .151           | .158          | -.159 - .461 | .954     | .340            | .681                    |
| Index of moderated mediation (ab2)                       | -.000          | .001          | -.003 - .002 | .397     | .692            | 1.0                     |
| <b>CUDIT-R</b>                                           | <b>B</b>       | <b>SE (B)</b> | <b>95%CI</b> | <b>z</b> | <b>p</b>        | <b>p<sub>bonf</sub></b> |
| CUDIT-R ~ Attentional bias (c1)                          | .154           | .106          | -.054 - .361 | 1.453    | .146            | .292                    |
| SI Craving ~ Attentional bias (a)                        | .015           | .037          | -.057 - .088 | .407     | .684            | 1.0                     |
| CUDIT-R ~ SI Craving (b1)                                | .143           | .152          | -.155 - .441 | .939     | .348            | .695                    |
| CUDIT-R ~ Interference control (c2)                      | .006           | .028          | -.049 - .062 | .219     | .826            | 1.0                     |
| CUDIT-R ~ SI Craving * Interference control (b2)         | -.017          | .015          | -.046 - .012 | 1.153    | .249            | .498                    |
| CUDIT-R ~ Attentional bias * Interference control (c3)   | -.013          | .008          | -.029 - .002 | 1.683    | .092            | .185                    |
| Indirect (a(b + b2W))                                    | .002           | .006          | -.009 - .014 | .375     | .708            | 1.0                     |
| Direct (c1+c3W)                                          | .156           | .106          | -.053 - .364 | 1.465    | .143            | .286                    |
| Total (direct+indirect)                                  | .158           | .107          | -.051 - .367 | 1.483    | .138            | .276                    |
| Index of moderated mediation (ab2)                       | -.000          | .001          | -.002 - .001 | .384     | .701            | 1.0                     |
| <b>Grams per week</b>                                    | <b>B</b>       | <b>SE (B)</b> | <b>95%CI</b> | <b>z</b> | <b>P</b>        | <b>p<sub>bonf</sub></b> |
| Gram/Week ~ SI Craving (c1)                              | .009           | .024          | -.038 - .055 | .366     | .715            | 1.0                     |
| Attentional Bias ~ SI Craving (a)                        | .059           | .082          | -.102 - .221 | .720     | .471            | .943                    |
| Gram/Week ~ Attentional bias (b1)                        | -.012          | .015          | -.042 - .017 | .814     | .416            | .832                    |
| Gram/Week ~ Interference control (c2)                    | .016           | .004          | .008 - .024  | 3.963    | <b>&lt;.001</b> | <b>&lt;.001</b>         |
| Gram/Week ~ Attentional bias * Interference control (b2) | -.001          | .001          | -.003 - .001 | .774     | .439            | .878                    |
| Gram/Week ~ SI Craving * Interference control (c3)       | -.003          | .002          | -.007 - .002 | 1.169    | .242            | .485                    |
| Indirect (a(b + b2W))                                    | -.001          | .001          | -.003 - .002 | .535     | .593            | 1.0                     |
| Direct (c1+c3W)                                          | .009           | .024          | -.037 - .056 | .394     | .694            | 1.0                     |
| Total (direct+indirect)                                  | .009           | .024          | -.038 - .055 | .363     | .716            | 1.0                     |
| Index of moderated mediation (ab2)                       | -.000          | .000          | .000 - .000  | .527     | .598            | 1.0                     |
| <b>Grams per week</b>                                    | <b>B</b>       | <b>SE (B)</b> | <b>95%CI</b> | <b>z</b> | <b>p</b>        | <b>p<sub>bonf</sub></b> |
| Gram/Week ~ Attentional bias (c1)                        | -.012          | .016          | -.043 - .018 | .792     | .428            | .857                    |
| SI Craving ~ Attentional bias (a)                        | .027           | .037          | -.046 - .099 | .720     | .471            | .943                    |
| Gram/Week ~ SI Craving (b1)                              | .009           | .023          | -.036 - .053 | .384     | .701            | 1.0                     |
| Gram/Week ~ Interference control (c2)                    | .016           | .004          | .008 - .024  | 3.963    | <b>&lt;.001</b> | <b>&lt;.001</b>         |
| Gram/Week ~ SI Craving * Interference control (b2)       | -.003          | .002          | -.007 - .002 | 1.226    | .220            | .440                    |
| Gram/Week ~ Attentional bias * Interference control (c3) | -.001          | .001          | -.003 - .001 | .754     | .451            | .901                    |
| Indirect (a(b + b2W))                                    | .000           | .001          | -.001 - .002 | .357     | .721            | 1.0                     |
| Direct (c1+c3W)                                          | -.012          | .016          | -.043 - .019 | .775     | .438            | .877                    |
| Total (direct+indirect)                                  | -.012          | .016          | -.043 - .019 | .759     | .448            | .896                    |
| Index of moderated mediation (ab2)                       | -.000          | .000          | .000 - .000  | .621     | .535            | 1.0                     |

*Note: CUDIT-R: cannabis use disorder identification test; p<sub>bonf</sub>: Bonferroni corrected p-values; SI craving: session induced craving; SE: standard error; Maximum likelihood estimation used in all models; See Figure S2 & Figure S3 for additional information on the included models.*

Attentional Bias in Cannabis Users

| <b>Table S7. Results of exploratory simple regression analyses including average session (AS) craving instead of session induced (SI) craving</b> |          |                |              |          |          |                         |                                                                                                          |
|---------------------------------------------------------------------------------------------------------------------------------------------------|----------|----------------|--------------|----------|----------|-------------------------|----------------------------------------------------------------------------------------------------------|
| <b>Model</b>                                                                                                                                      |          | <b>Results</b> |              |          |          |                         |                                                                                                          |
| <b>CUDIT-R</b>                                                                                                                                    | <b>B</b> | <b>SE (B)</b>  | <b>95%CI</b> | <b>t</b> | <b>p</b> | <b>p<sub>bonf</sub></b> | <b>F-test</b>                                                                                            |
| Intercept                                                                                                                                         | -.056    | .333           | -.711 - .599 | .169     | .866     | 1.0                     | <i>F</i> (1,338) = 28.19, <i>R</i> <sup>2</sup> = .074, <i>p</i> < .001, <i>p</i> <sub>bonf</sub> < .001 |
| AS Craving                                                                                                                                        | 1.755    | .330           | 1.11 - 2.41  | 5.309    | <.001    | <.001                   |                                                                                                          |
| <b>Grams per week</b>                                                                                                                             | <b>B</b> | <b>SE (B)</b>  | <b>95%CI</b> | <b>t</b> | <b>p</b> | <b>p<sub>bonf</sub></b> | <b>F-test</b>                                                                                            |
| Intercept                                                                                                                                         | -.019    | .214           | -.440 - .401 | .090     | .928     | 1.0                     | <i>F</i> (1,330) = 20.93, <i>R</i> <sup>2</sup> = .057, <i>p</i> < .001, <i>p</i> <sub>bonf</sub> < .001 |
| AS Craving                                                                                                                                        | .977     | .214           | .557 - 1.40  | 4.575    | <.001    | <.001                   |                                                                                                          |

*Note: AS craving: average session craving; CUDIT-R: cannabis use disorder identification test; p<sub>bonf</sub>: Bonferroni corrected p-values; SE: standard error; R<sup>2</sup>: adjusted R-squared*

Attentional Bias in Cannabis Users

| <b>Table S8. Results of exploratory moderation &amp; mediation analyses including average session (AS) craving instead of session induced (SI) craving</b> |                |               |               |          |          |                         |
|------------------------------------------------------------------------------------------------------------------------------------------------------------|----------------|---------------|---------------|----------|----------|-------------------------|
| <b>Moderation</b>                                                                                                                                          |                |               |               |          |          |                         |
| <b>Model</b>                                                                                                                                               | <b>Results</b> |               |               |          |          |                         |
| <b>CUDIT-R</b>                                                                                                                                             | <b>B</b>       | <b>SE (B)</b> | <b>95%CI</b>  | <b>z</b> | <b>p</b> | <b>p<sub>bonf</sub></b> |
| Intercept                                                                                                                                                  | -.059          | .336          | -.717 - .599  | -.175    | .850     | 1.0                     |
| AS Craving                                                                                                                                                 | 1.844          | .330          | 1.197 - 2.490 | 5.595    | <.001    | <.001                   |
| Interference control                                                                                                                                       | -.016          | .027          | -.068 - .037  | .589     | .556     | 1.0                     |
| AS Craving * Interference control                                                                                                                          | -.004          | .024          | -.051 - .042  | .183     | .855     | 1.0                     |
| <b>Grams per week</b>                                                                                                                                      | <b>B</b>       | <b>SE (B)</b> | <b>95%CI</b>  | <b>z</b> | <b>p</b> | <b>p<sub>bonf</sub></b> |
| Intercept                                                                                                                                                  | .023           | .213          | -.394 - .440  | .107     | .915     | 1.0                     |
| AS Craving                                                                                                                                                 | .919           | .211          | .507 - 1.332  | 4.367    | <.001    | <.001                   |
| Interference control                                                                                                                                       | .056           | .017          | .023-.089     | 3.313    | .001     | .002                    |
| AS Craving * Interference control                                                                                                                          | -.010          | .015          | -.040 - .019  | .679     | .497     | .994                    |
| <b>Mediation</b>                                                                                                                                           |                |               |               |          |          |                         |
| <b>CUDIT-R</b>                                                                                                                                             | <b>B</b>       | <b>SE (B)</b> | <b>95%CI</b>  | <b>z</b> | <b>p</b> | <b>p<sub>bonf</sub></b> |
| CUDIT-R ~ AS Craving (c)                                                                                                                                   | 1.733          | .336          | 1.075 - 2.392 | 5.160    | <.001    | <.001                   |
| Attentional Bias ~ AS Craving (a)                                                                                                                          | .545           | .181          | .191 - .900   | 3.013    | .003     | .005                    |
| CUDIT-R ~ Attentional Bias (b)                                                                                                                             | .027           | .100          | -.169 - .222  | .267     | .790     | 1.0                     |
| Indirect (ab)                                                                                                                                              | .014           | .055          | -.092 - .121  | .266     | .790     | 1.0                     |
| Direct (c')                                                                                                                                                | 1.733          | .336          | 1.075 - 2.392 | 5.160    | <.001    | <.001                   |
| Total (ab + c')                                                                                                                                            | 1.748          | .332          | 1.098 - 2.398 | 5.272    | <.001    | <.001                   |
| <b>CUDIT-R</b>                                                                                                                                             | <b>B</b>       | <b>SE (B)</b> | <b>95%CI</b>  | <b>z</b> | <b>p</b> | <b>p<sub>bonf</sub></b> |
| CUDIT-R ~ Attentional bias (c)                                                                                                                             | .027           | .100          | -.169 - .222  | .267     | .790     | 1.0                     |
| AS Craving ~ Attentional bias (a)                                                                                                                          | .048           | .016          | .017 - .079   | 3.013    | .003     | .005                    |
| CUDIT-R ~ AS Craving (b)                                                                                                                                   | 1.733          | .336          | 1.075 - 2.392 | 5.160    | <.001    | <.001                   |
| Indirect (ab)                                                                                                                                              | .083           | .032          | .021 - .146   | 2.602    | .009     | .019                    |
| Direct (c')                                                                                                                                                | .027           | .100          | -.169 - .222  | .267     | .790     | 1.0                     |
| Total (ab + c')                                                                                                                                            | .110           | .102          | -.090 - .310  | 1.075    | .283     | .567                    |
| <b>Grams per week</b>                                                                                                                                      | <b>B</b>       | <b>SE (B)</b> | <b>95%CI</b>  | <b>z</b> | <b>p</b> | <b>p<sub>bonf</sub></b> |
| Grams/Week ~ AS Craving (c)                                                                                                                                | 1.033          | .215          | .611 - 1.454  | 4.803    | <.001    | <.001                   |
| Attentional Bias ~ AS Craving (a)                                                                                                                          | .552           | .183          | .194 - .910   | 3.019    | .003     | .005                    |
| Grams/Week ~ Attentional Bias (b)                                                                                                                          | -.101          | .064          | -.225 - .024  | 1.578    | .114     | .229                    |
| Indirect (ab)                                                                                                                                              | -.055          | .040          | -.133 - .022  | 1.399    | .162     | .324                    |
| Direct (c')                                                                                                                                                | 1.033          | .215          | .611 - 1.454  | 4.803    | <.001    | <.001                   |
| Total (ab + c')                                                                                                                                            | .977           | .213          | .560 - 1.395  | 4.589    | <.001    | <.001                   |
| <b>Grams per week</b>                                                                                                                                      | <b>B</b>       | <b>SE (B)</b> | <b>95%CI</b>  | <b>z</b> | <b>p</b> | <b>p<sub>bonf</sub></b> |
| Grams/Week ~ Attentional bias (c)                                                                                                                          | -.101          | .064          | -.225 - .024  | 1.578    | .114     | .229                    |
| AS Craving ~ Attentional bias (a)                                                                                                                          | .048           | .016          | .017 - .080   | 3.019    | .003     | .005                    |
| Grams/Week ~ AS Craving (b)                                                                                                                                | 1.033          | .215          | .611 - 1.454  | 4.803    | <.001    | <.001                   |
| Indirect (ab)                                                                                                                                              | .050           | .020          | .012 - .088   | 2.556    | .011     | .021                    |
| Direct (c')                                                                                                                                                | -.101          | .064          | -.225 - .024  | 1.578    | .114     | .229                    |
| Total (ab + c')                                                                                                                                            | -.051          | .065          | -.178 - .077  | .778     | .437     | .873                    |

Note: AS craving: average session craving; CUDIT-R: cannabis use disorder identification test; p<sub>bonf</sub>: Bonferroni corrected p-values; SE: standard error; R<sup>2</sup>: adjusted R-squared; Maximum likelihood estimation used in all models.

Attentional Bias in Cannabis Users

**Table S9. Results of exploratory moderated-mediation analyses including average session (AS) craving instead of session induced (SI) craving**

| Model                                                    | Results  |               |               |          |          |                         |
|----------------------------------------------------------|----------|---------------|---------------|----------|----------|-------------------------|
|                                                          | <i>B</i> | <i>SE (B)</i> | <i>95%CI</i>  | <i>z</i> | <i>p</i> | <i>p<sub>bonf</sub></i> |
| <b>CUDIT-R</b>                                           |          |               |               |          |          |                         |
| CUDIT-R ~ AS Craving (c1)                                | 1.794    | .335          | 1.137 - 2.450 | 5.353    | <.001    | <.001                   |
| Attentional Bias ~ AS Craving (a)                        | .552     | .180          | .198 - .906   | 3.059    | .002     | .004                    |
| CUDIT-R ~ Attentional bias (b1)                          | .064     | .100          | -.133 - .261  | .637     | .524     | 1.0                     |
| CUDIT-R ~ Interference control (c2)                      | -.012    | .027          | -.065 - .040  | .458     | .647     | 1.0                     |
| CUDIT-R ~ Attentional bias * Interference control (b2)   | -.012    | .008          | -.027 - .003  | 1.512    | .130     | .260                    |
| CUDIT-R ~ AS Craving * Interference control (c3)         | .007     | .025          | -.042 - .055  | .262     | .793     | 1.0                     |
| Indirect (a(b + b2W))                                    | .036     | .057          | -.075 - .148  | .641     | .522     | 1.0                     |
| Direct (c1+c3W)                                          | 1.793    | .335          | 1.136 - 2.449 | 5.350    | <.001    | <.001                   |
| Total (direct+indirect)                                  | 1.829    | .331          | 1.181 - 2.477 | 5.532    | <.001    | <.001                   |
| Index of moderated mediation (ab2)                       | -.006    | .005          | -.016 - .003  | 1.356    | .175     | .350                    |
| <b>CUDIT-R</b>                                           |          |               |               |          |          |                         |
| CUDIT-R ~ Attentional bias (c1)                          | .064     | .103          | -.139 - .267  | .618     | .537     | 1.0                     |
| AS Craving ~ Attentional bias (a)                        | .050     | .016          | .018 - .081   | 3.059    | .002     | .004                    |
| CUDIT-R ~ AS Craving (b1)                                | 1.794    | .335          | 1.137 - 2.450 | 5.354    | <.001    | <.001                   |
| CUDIT-R ~ Interference control (c2)                      | -.012    | .027          | -.065 - .040  | .458     | .647     | 1.0                     |
| CUDIT-R ~ AS Craving * Interference control (b2)         | .007     | .025          | -.042 - .055  | .261     | .794     | 1.0                     |
| CUDIT-R ~ Attentional bias * Interference control (c3)   | -.012    | .008          | -.027 - .004  | 1.465    | .143     | .286                    |
| Indirect (a(b + b2W))                                    | .089     | .033          | .023 - .154   | 2.655    | .008     | .016                    |
| Direct (c1+c3W)                                          | .066     | .104          | -.138 - .270  | .633     | .527     | 1.0                     |
| Total (direct+indirect)                                  | .155     | .107          | -.055 - .364  | 1.448    | .147     | .295                    |
| Index of moderated mediation (ab2)                       | .000     | .001          | -.002 - .003  | .260     | .795     | 1.0                     |
| <b>Grams per week</b>                                    |          |               |               |          |          |                         |
| Gram/Week ~ AS Craving (c1)                              | .975     | .213          | .558 - 1.392  | 4.588    | <.001    | <.001                   |
| Attentional Bias ~ AS Craving (a)                        | .559     | .182          | .202 - .916   | 3.069    | .002     | .004                    |
| Gram/Week ~ Attentional bias (b1)                        | -.106    | .064          | -.231 - .018  | 1.672    | .095     | .189                    |
| Gram/Week ~ Interference control (c2)                    | .058     | .017          | .025 - .091   | 3.460    | .001     | .001                    |
| Gram/Week ~ Attentional bias * Interference control (b2) | -.002    | .005          | -.011 - .008  | .360     | .719     | 1.0                     |
| Gram/Week ~ AS Craving * Interference control (c3)       | -.009    | .016          | -.040 - .022  | .574     | .566     | 1.0                     |
| Indirect (a(b + b2W))                                    | -.059    | .040          | -.138 - .020  | 1.463    | .143     | .287                    |
| Direct (c1+c3W)                                          | .977     | .213          | .561 - 1.394  | 4.598    | <.001    | <.001                   |
| Total (direct+indirect)                                  | .918     | .210          | .506 - 1.330  | 4.362    | <.001    | <.001                   |
| Index of moderated mediation (ab2)                       | -.001    | .003          | -.006 - .004  | .358     | .720     | 1.0                     |
| <b>Grams per week</b>                                    |          |               |               |          |          |                         |
| Gram/Week ~ Attentional bias (c1)                        | -.106    | .065          | -.234 - .022  | 1.624    | .104     | .209                    |
| AS Craving ~ Attentional bias (a)                        | .050     | .016          | .018 - .082   | 3.069    | .002     | .004                    |
| Gram/Week ~ AS Craving (b1)                              | .975     | .212          | .559 - 1.391  | 4.591    | <.001    | <.001                   |
| Gram/Week ~ Interference control (c2)                    | .058     | .017          | .025 - .091   | 3.460    | .001     | .001                    |
| Gram/Week ~ AS Craving * Interference control (b2)       | -.009    | .016          | -.040 - .022  | -.572    | .567     | 1.0                     |
| Gram/Week ~ Attentional bias * Interference control (c3) | -.002    | .005          | -.012 - .008  | -.350    | .726     | 1.0                     |
| Indirect (a(b + b2W))                                    | .049     | .019          | .011 - .086   | 2.552    | .011     | .021                    |
| Direct (c1+c3W)                                          | -.106    | .066          | -.235 - .023  | 1.610    | .107     | .215                    |
| Total (direct+indirect)                                  | -.057    | .067          | -.188 - .074  | .852     | .394     | .788                    |
| Index of moderated mediation (ab2)                       | -.000    | .001          | -.002 - .001  | .563     | .574     | 1.0                     |

Note: AS craving: average session craving; CUDIT-R: cannabis use disorder identification test; *p<sub>bonf</sub>* : Bonferroni corrected p-values; SE: standard error; Maximum likelihood estimation used in all models; See Figure S2 & Figure S3 for additional information on the included models.

Attentional Bias in Cannabis Users

| <b>Table S10. Results of regression analyses assessing the association between interference control and heaviness and severity of use in individuals in treatment for CUD.</b> |                |               |                |          |          |                         |                                                               |
|--------------------------------------------------------------------------------------------------------------------------------------------------------------------------------|----------------|---------------|----------------|----------|----------|-------------------------|---------------------------------------------------------------|
| <b>Model</b>                                                                                                                                                                   | <b>Results</b> |               |                |          |          |                         |                                                               |
| <b>CUDIT-R</b>                                                                                                                                                                 | <b>B</b>       | <b>SE (B)</b> | <b>95%CI</b>   | <b>t</b> | <b>p</b> | <b>p<sub>bonf</sub></b> | <b>F-test</b>                                                 |
| Intercept                                                                                                                                                                      | -.121          | .705          | -1.524 - 1.282 | .172     | .864     | 1.0                     | $F(1,84) < .001, R^2 = -.012,$<br>$p = .978, p_{bonf} = 1.0$  |
| Interference control                                                                                                                                                           | .001           | .056          | -.110 - .113   | .027     | .978     | 1.0                     |                                                               |
| <b>Grams per week</b>                                                                                                                                                          | <b>B</b>       | <b>SE (B)</b> | <b>95%CI</b>   | <b>t</b> | <b>p</b> | <b>p<sub>bonf</sub></b> | <b>F-test</b>                                                 |
| Intercept                                                                                                                                                                      | -.252          | .938          | -2.126 - 1.620 | .269     | .788     | 1.0                     | $F(1,65) = 1.482, R^2 = .007,$<br>$p = .228, p_{bonf} = .455$ |
| Interference control                                                                                                                                                           | .091           | .075          | -.059 - .241   | 1.218    | .228     | .455                    |                                                               |

*Note: CUDIT-R: cannabis use disorder identification test; p<sub>bonf</sub> : Bonferroni corrected p-values; SE: standard error; R<sup>2</sup>: adjusted R-squared*

## References

- Cousijn, J., Snoek, R. W. M., & Wiers, R. W. (2013). Cannabis intoxication inhibits avoidance action tendencies: a field study in the Amsterdam coffee shops. *Psychopharmacology*, *229*(1), 167–176. <https://doi.org/10.1007/s00213-013-3097-6>
- Cousijn, J., van Benthem, P., van der Schee, E., & Spijkerman, R. (2015). Motivational and control mechanisms underlying adolescent cannabis use disorders: A prospective study. *Developmental Cognitive Neuroscience*, *16*, 36–45. <https://doi.org/10.1016/j.dcn.2015.04.001>
- Cousijn, J., & van Duijvenvoorde, A. C. K. (2018). Cognitive and mental health predictors of withdrawal severity during an active attempt to cut down cannabis use. *Frontiers in Psychiatry*, *9*(JUL), 1–10. <https://doi.org/10.3389/fpsy.2018.00301>
- Cousijn, J., Watson, P., Koenders, L., Vingerhoets, W. A. M., Goudriaan, A. E., & Wiers, R. W. (2013). Cannabis dependence, cognitive control and attentional bias for cannabis words. *Addictive Behaviors*, *38*(12), 2825–2832. <https://doi.org/10.1016/j.addbeh.2013.08.011>
- Heishman, S. J., Singleton, E. G., & Liguori, A. (2001). Marijuana Craving Questionnaire: Development and initial validation of a self-report instrument. *Addiction*, *96*(7), 1023–1034. <https://doi.org/10.1046/j.1360-0443.2001.967102312.x>
- van Kampen, A. C., Cousijn, J., Engel, C., Rinck, M., & Dijkstra, B. A. G. (2020). Attentional bias, craving and cannabis use in an inpatient sample of adolescents and young adults diagnosed with cannabis use disorder: The moderating role of cognitive control. *Addictive Behaviors*, *100*(September 2019), 106126. <https://doi.org/10.1016/j.addbeh.2019.106126>
